# Supplementary material
Source: publisher site journal article supplement (https://www.dovepress.com/article/602836)
Supplement: Supplementary file 1 [file 602836%20Supplementary%20Material.pdf]

## Supplementary Material

*For: Remimazolam versus Sevoflurane for Paediatric Circumcision: A Randomised Controlled Trial Evaluating Emergence Delirium*

### Supplementary Table S1

Supplementary Table S1. Subgroup Analysis of Emergence Delirium Incidence by Age

| Subgroup                                        | n   | Remimazolam<br>m<br>n/N (%) | Sevoflurane<br>n/N (%) | RR (95% CI)         | ARR    | P<br>value |
|-------------------------------------------------|-----|-----------------------------|------------------------|---------------------|--------|------------|
| Overall                                         | 100 | 6/50 (12.0%)                | 18/50<br>(36.0%)       | 0.33<br>(0.14-0.77) | 0.24   | 0.009      |
| Preschool (3-6 y)                               | 36  | 2/15 (13.3%)                | 8/21<br>(38.1%)        | 0.35<br>(0.09-1.41) | 24.80% | 0.142      |
| School-age (7-12 y)                             | 64  | 4/35 (11.4%)                | 10/29<br>(34.5%)       | 0.33<br>(0.12-0.94) | 23.10% | 0.035      |
| Interaction P<br>value<br>(age ×<br>treatment): |     |                             |                        |                     |        | 0.89       |

*Supplementary Table S1. Subgroup analysis of emergence delirium incidence by age. Both preschool and school-age subgroups showed similar effect magnitudes (65–67% relative reduction), supporting consistency of treatment effect across the paediatric age spectrum studied.*

*Abbreviations: ARR = absolute risk reduction; CI = confidence interval; PAED = Paediatric Anaesthesia Emergence Delirium scale; RR = relative risk.*

*Statistical methods: Relative risks calculated using the Newcombe-Wilson method without continuity correction. P values from Fisher's exact test for individual subgroups; interaction tested using logistic regression with age group × treatment term.*

*Caution: Subgroup analyses were underpowered and should be considered exploratory. The interaction P value of 0.89 suggests no meaningful effect modification by age, but confidence intervals for the preschool subgroup are wide due to limited sample size. These findings should inform hypothesis generation for future adequately powered studies rather than definitive conclusions.*

*Bold values indicate statistical significance (P < 0.05).*

## Supplementary Table S2

Supplementary Table S2. Sensitivity Analysis Using Alternative PAED  $\geq 10$  Threshold  
Comparison of emergence delirium incidence using PAED  $\geq 10$  versus  $\geq 12$  thresholds

| Threshold                       | Remimazolam<br>(n=50) | Sevoflurane<br>(n=50) | RR<br>(95% CI)      | P<br>Value | NNT<br>(95% CI)   |
|---------------------------------|-----------------------|-----------------------|---------------------|------------|-------------------|
| PAED $\geq 12$<br>(Primary)     | 6/50 (12.0%)          | 18/50 (36.0%)         | 0.33<br>(0.14–0.77) | 0.009      | 4.2<br>(2.5–11.1) |
| PAED $\geq 10$<br>(Sensitivity) | 9/50 (18.0%)          | 27/50 (54.0%)         | 0.33<br>(0.18–0.63) | <0.001     | 2.8<br>(1.9–5.3)  |

Abbreviations: RR, relative risk; CI, confidence interval; NNT, number needed to treat; PAED, Paediatric Anaesthesia

Emergence Delirium scale.

Note: The consistency of relative risk estimates across both thresholds (RR 0.33) reinforces the robustness of the findings.

Bold values indicate statistical significance ( $P < 0.05$ ).

## Supplementary Figure S1

### Supplementary Figure S1. Distribution of Peak PAED Scores

Box plots with individual data points for patients meeting delirium threshold

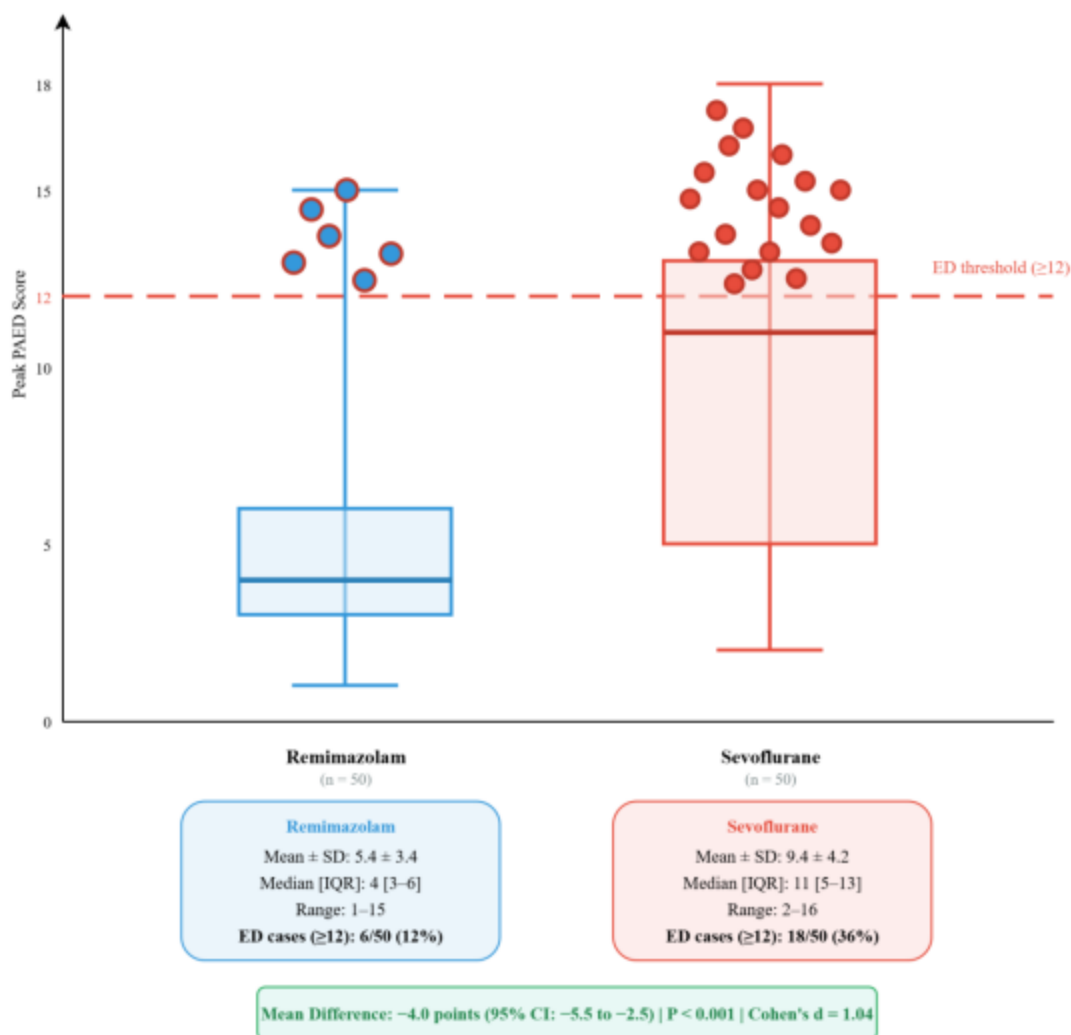

Supplementary Figure S1. Distribution of peak PAED scores. Box plots show median and interquartile range; individual data points are shown for patients meeting the delirium threshold ( $\geq 12$ ).

## Supplementary Figure S2

**Supplementary Figure S2. Kaplan-Meier Analysis of Time to Emergence**

*Cumulative probability of awakening (MOAA/S – 5) over time*

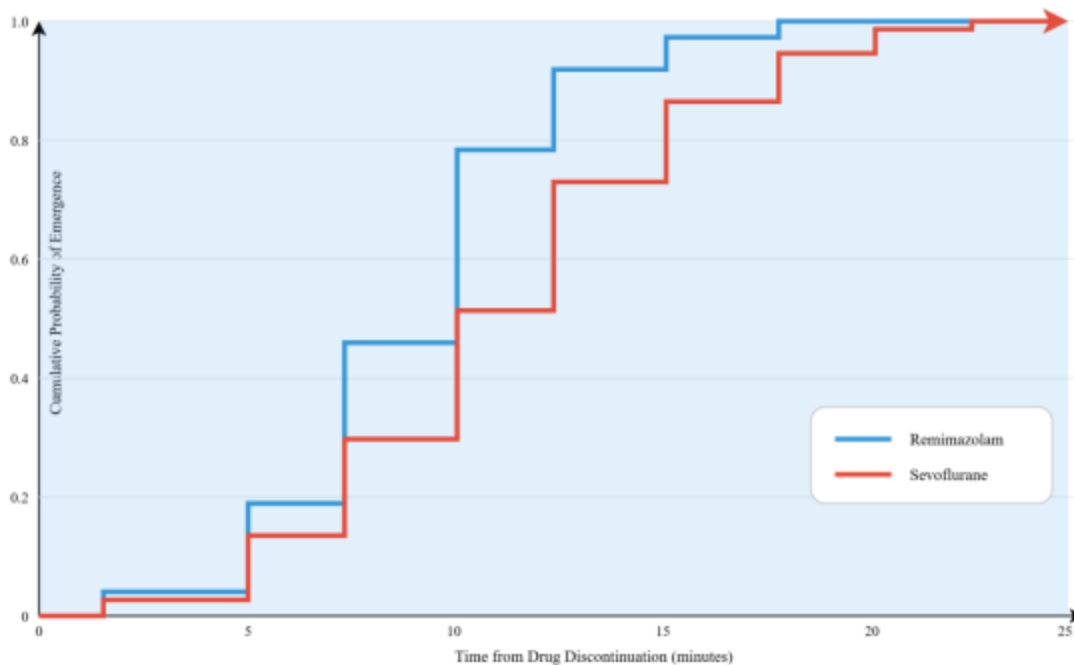

**Hazard Ratio: 1.68**  
(95% CI: 1.18–2.40)

**Log-rank Test**  
 $P < 0.001$

**Median Time (Remi)**  
10.2 min (8.8–11.6)

**Median Time (Sevo)**  
13.1 min (11.7–14.5)

**Number at risk:**

| Time (min)  | 0  | 5  | 10 | 15 | 20 |
|-------------|----|----|----|----|----|
| Remimazolam | 50 | 48 | 22 | 5  | 0  |
| Sevoflurane | 50 | 49 | 35 | 12 | 2  |

*Interpretation: The hazard ratio of 1.68 favours remimazolam, indicating a 68% higher probability of emergence at any given time point compared with sevoflurane. The curves separate early and remain divergent, with median emergence times differing by approximately three minutes.*

*Supplementary Figure S2. Kaplan-Meier analysis of time to emergence. Hazard ratio 1.68 (95% CI 1.18 – 2.40) favours remimazolam, indicating 68% higher probability of emergence at any given time point. Log-rank  $P < 0.001$ .*

## Supplementary Figure S3

Supplementary Figure S3. Haemodynamic Trajectories

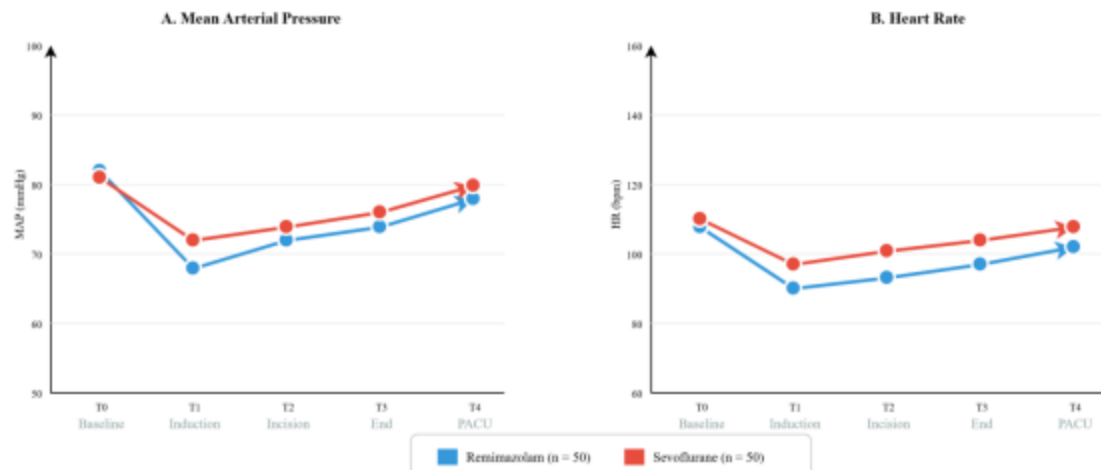

T0: Baseline (pre-induction) | T1: Post-induction (MOAA/S  $\leq 1$ ) | T2: Surgical incision | T3: End of surgery | T4: PACU discharge

**Key observation:**

Both groups maintained haemodynamic stability throughout the perioperative period. Although transient hypotension occurred more frequently with remimazolam (12% vs 2%), this was not accompanied by bradycardia—the heart rate curves show parallel trajectories without significant group divergence. This pattern suggests the hypotension reflects decreased systemic vascular resistance (baroreceptor-mediated sympatholysis) rather than myocardial depression.

Supplementary Figure S3. Haemodynamic trajectories from baseline through recovery. Panel A shows mean arterial pressure (MAP) and Panel B shows heart rate (HR) at five perioperative timepoints. Data are presented as mean with error bars representing standard deviation. The parallel heart rate trajectories, without group divergence, support the interpretation that transient hypotension in the remimazolam group reflected vasodilation rather than cardiac depression. MAP = mean arterial pressure; HR = heart rate; PACU = post-anaesthesia care unit; bpm = beats per minute.

Supplementary Figure S3. Haemodynamic trajectories from baseline through recovery. Panel A shows mean arterial pressure (MAP) and Panel B shows heart rate (HR) at five perioperative timepoints.

## Supplementary File 1: CONSORT 2025 Checklist

### CONSORT 2025 Checklist

| Section/Topic                          | No | CONSORT 2025 Checklist Item Description                                                    | Page No. | Comments                                                |
|----------------------------------------|----|--------------------------------------------------------------------------------------------|----------|---------------------------------------------------------|
| Title and structured abstract          | 1a | Identification as a randomised trial                                                       | 1        | Title includes 'Randomised Controlled Trial'            |
|                                        | 1b | Structured summary of trial design, methods, results, and conclusions                      | 1-2      | Abstract with Background, Methods, Results, Conclusions |
| Trial registration                     | 2  | Name of trial registry, identifying number (with URL) and date of registration             | 2        | ChiCTR2500095974; 15 January 2025                       |
| Protocol and statistical analysis plan | 3  | Where the trial protocol and statistical analysis plan can be accessed                     | 2        | Reference 16; BMC Anesthesiology                        |
| Data sharing                           | 4  | Where and how the individual de-identified participant data can be accessed                | 11       | Available upon request 6-36 months post-publication     |
| Funding and conflicts of interest      | 5a | Sources of funding and other support, and role of funders                                  | 11       | Wanzhou District fund; no funder role                   |
|                                        | 5b | Financial and other conflicts of interest of the manuscript authors                        | 11       | None declared                                           |
| Background and rationale               | 6  | Scientific background and rationale                                                        | 2-3      |                                                         |
| Objectives                             | 7  | Specific objectives related to benefits and harms                                          | 3        | Primary: timing; Secondary: ED, harms                   |
| Patient and public involvement         | 8  | Details of patient or public involvement in the design, conduct and reporting of the trial | 3        | No PPI; acknowledged as limitation                      |
| Trial design                           | 9  | Description of trial design including type of trial, allocation ratio, and framework       | 3        | Parallel, 1:1, superiority                              |
| Changes to trial protocol              | 10 | Important changes to the trial after it commenced                                          | 5        | No changes made                                         |

|                                    |     |                                                                                      |     |                                                                         |
|------------------------------------|-----|--------------------------------------------------------------------------------------|-----|-------------------------------------------------------------------------|
| Trial setting                      | 11  | Settings and locations where the trial was conducted                                 | 3   | Single centre, Chongqing, China                                         |
| Eligibility criteria               | 12a | Eligibility criteria for participants                                                | 3   | Age 3-12, ASAI-II, circumcision                                         |
|                                    | 12b | Eligibility criteria for sites and for individuals delivering the interventions      | 3   | Board-certified, $\geq 5$ years experience, $\geq 20$ remimazolam cases |
| Intervention and comparator        | 13  | Intervention and comparator with sufficient details to allow replication             | 4   | Doses, timing, titration described                                      |
| Outcomes                           | 14  | Prespecified primary and secondary outcomes                                          | 4-5 | MOAA/S, PAED, FLACC, STAI-S, VAS                                        |
| Harms                              | 15  | How harms were defined and assessed                                                  | 5   | Predefined thresholds for each AE                                       |
| Sample size                        | 16a | How sample size was determined                                                       | 5   | 90% power, $\alpha=0.05$ , 3 min difference                             |
|                                    | 16b | Explanation of any interim analyses and stopping guidelines                          | 5   | No interim analyses; DSMB review at 50%                                 |
| Randomisation: Sequence generation | 17a | Who generated the random allocation sequence and the method used                     | 3   | Independent statistician, computer-generated                            |
|                                    | 17b | Type of randomisation and details of any restriction                                 | 3   | Stratified by age, blocks of 4                                          |
| Allocation concealment mechanism   | 18  | Mechanism used to implement the random allocation sequence                           | 3   | Sequentially numbered opaque envelopes                                  |
| Implementation                     | 19  | Whether personnel who enrolled/assigned participants had access to sequence          | 3   | Envelopes opened after consent                                          |
| Blinding                           | 20a | Who was blinded after assignment to interventions                                    | 3-4 | Assessors, analysts; not providers                                      |
|                                    | 20b | If blinded, how blinding was achieved and description of similarity of interventions | 3-4 | Physical separation, mint lip balm                                      |
| Statistical methods                | 21a | Statistical methods used to compare groups for primary and secondary outcomes        | 5-6 | t-test, $\chi^2$ , Fisher's, Cox regression                             |
|                                    | 21b | Definition of who is included in                                                     | 5-6 | ITT, all randomised                                                     |

|                                           |     |                                                                                        |             |                                                                       |
|-------------------------------------------|-----|----------------------------------------------------------------------------------------|-------------|-----------------------------------------------------------------------|
|                                           |     | each analysis                                                                          |             |                                                                       |
|                                           | 21c | How missing data were handled in the analysis                                          | 6           | No missing data                                                       |
|                                           | 21d | Methods for any additional analyses                                                    | 5-6         | Age subgroups (prespecified), sensitivity                             |
| Participant flow                          | 22a | Numbers randomly assigned, received intervention, and analysed                         | 6           | Figure 1; 50/50, all analysed                                         |
|                                           | 22b | Losses and exclusions after randomisation, with reasons                                | 6           | None                                                                  |
| Recruitment                               | 23a | Dates defining the periods of recruitment and follow-up                                | 3, 6        | July–November 2025                                                    |
|                                           | 23b | Why the trial ended or was stopped                                                     | N/A         | Completed per protocol                                                |
| Intervention and comparator delivery      | 24a | Intervention and comparator as they were actually administered                         | 6           | All received assigned intervention                                    |
|                                           | 24b | Concomitant care received during the trial for each group                              | 4           | Penile block, LMA, mechanical ventilation                             |
| Baseline data                             | 25  | A table showing baseline demographic and clinical characteristics                      | 6 (Table 1) | Age, weight, BMI, ASA, anxiety scores                                 |
| Numbers analysed, outcomes and estimation | 26  | For each outcome: participants analysed, results, effect size and precision            | 6-7         | Mean diff, RR, 95% CI for all outcomes                                |
| Harms                                     | 27  | All harms or unintended events in each group                                           | 7-8         | Table 3, Figure 5; zero events reported                               |
| Ancillary analyses                        | 28  | Any other analyses performed, distinguishing pre-specified from post hoc               | 6-7         | Age subgroups, PAED $\geq$ 10 sensitivity                             |
| Interpretation                            | 29  | Interpretation consistent with results, balancing benefits and harms                   | 8-10        | 67% ED reduction; hypotension trend                                   |
| Limitations                               | 30  | Trial limitations, addressing sources of potential bias, imprecision, generalisability | 10          | Single-centre, unblinded providers, no PPI, underpowered for rare AEs |

*Citation: Hopewell S, Chan AW, Collins GS, et al. CONSORT 2025 Statement: updated guideline for reporting randomised trials. BMJ. 2025;388:e081123.*

## Supplementary File 2: CONSORT Harms 2022 Checklist

### CONSORT Harms 2022 Checklist

Remimazolam versus Sevoflurane for Paediatric Circumcision: A Randomised Controlled Trial

| Section/Topic             | Item No | Item Description                                                                                                                                               | Page No. | Comments (Optional but Recommended)                                                                                                                                                            |
|---------------------------|---------|----------------------------------------------------------------------------------------------------------------------------------------------------------------|----------|------------------------------------------------------------------------------------------------------------------------------------------------------------------------------------------------|
| Title and abstract        | 1b      | Structured summary of trial design, methods, results of outcomes of benefits and harms, and conclusions                                                        | 1-2      | Abstract includes ED incidence (12% vs 36%), hypotension (12% vs 2%), and conclusions addressing both benefits and harms                                                                       |
| Background and objectives | 2b      | Specific objectives or hypotheses for outcomes of benefits and harms                                                                                           | 3        | Objectives include emergence delirium (benefit) and safety outcomes including hypotension, hypoxaemia, bradycardia, PONV (harms)                                                               |
| Outcomes                  | 6a      | Completely defined prespecified primary and secondary outcomes, for both benefits and harms, including how and when they were assessed                         | 4-5      | Harms defined with specific thresholds: hypotension (MAP decrease >20%), hypoxaemia (SpO <sub>2</sub> <90% for >30s), bradycardia (HR <60 or decrease >30%), PONV (any episode)                |
|                           | 6c      | Describe if and how non-prespecified outcomes of benefits and harms were identified, including any selection criteria, if applicable                           | N/A      | All reported harms were prespecified in the published protocol (Reference 16). No non-prespecified harms were identified during the trial.                                                     |
| Blinding                  | 11a     | If done, who was blinded after assignment to interventions (for example, participants, care providers, those assessing outcomes of benefits and harms) and how | 3-4      | Outcome assessors (PACU nurses) were blinded to group allocation; they assessed both efficacy (PAED) and safety (AEs). Providers were not blinded due to different administration routes. Data |

|                         |      |                                                                                                                                                                           |             |                                                                                                                                                                                             |
|-------------------------|------|---------------------------------------------------------------------------------------------------------------------------------------------------------------------------|-------------|---------------------------------------------------------------------------------------------------------------------------------------------------------------------------------------------|
|                         |      |                                                                                                                                                                           |             | analysts blinded until database lock.                                                                                                                                                       |
| Statistical methods     | 12a  | Statistical methods used to compare groups for primary and secondary outcomes of both benefits and harms                                                                  | 5-6         | Benefits: t-tests for continuous, $\chi^2$ for categorical, RR with 95% CI. Harms: Fisher's exact test for binary safety outcomes due to low expected cell counts; RR with 95% CI reported. |
| Participant flow        | 13a  | For each group, the numbers of participants who were randomly assigned, received intended treatment, and were analysed for outcomes of benefits and harms                 | 6, Figure 1 | Remimazolam: 50 randomised, 50 received, 50 analysed. Sevoflurane: 50 randomised, 50 received, 50 analysed. Same population analysed for both benefits and harms (ITT).                     |
| Recruitment             | 14a  | Dates defining the periods of recruitment and follow-up for outcomes of benefits and harms                                                                                | 3, 6        | Recruitment: July–November 2025. Follow-up for harms: from induction through PACU discharge (same day). No long-term harms follow-up.                                                       |
| Numbers analysed        | 16   | For each group, number of participants (denominator) included in each analysis of outcomes of benefits and harms and whether the analysis was by original assigned groups | 6-8         | n=50 per group for all analyses. ITT analysis by original assigned groups. No exclusions for safety analysis.                                                                               |
| Outcomes and estimation | 17a  | For each primary and secondary outcome of benefits and harms, results for each group, and the estimated effect size and its precision (such as 95% confidence interval)   | 6-8         | Benefits: ED 12% vs 36%, RR 0.33 (95% CI 0.14-0.77). Harms: Hypotension 12% vs 2%, RR 6.0 (95% CI 0.75-48); Hypoxaemia 8% vs 8%; Bradycardia 2% vs 4%; PONV 0% vs 10%.                      |
|                         | 17a2 | For outcomes omitted from the trial report (benefits and harms),                                                                                                          | N/A         | No outcomes were omitted from the report. All                                                                                                                                               |

|                    |     |                                                                                                                                                                                                |       |                                                                                                                                                                                                                                                                    |
|--------------------|-----|------------------------------------------------------------------------------------------------------------------------------------------------------------------------------------------------|-------|--------------------------------------------------------------------------------------------------------------------------------------------------------------------------------------------------------------------------------------------------------------------|
|                    |     | provide rationale for not reporting and indicate where the data can be accessed                                                                                                                |       | prespecified efficacy and safety outcomes are reported in Tables 2-3 and Figure 5.                                                                                                                                                                                 |
|                    | 17b | Presentation of both absolute and relative effect sizes is recommended, for outcomes of benefits and harms                                                                                     | 6-8   | Absolute: incidence per group (n/50, %). Relative: RR with 95% CI. NNT/NNH calculated where appropriate.                                                                                                                                                           |
|                    | 17c | Report zero events if no harms were observed                                                                                                                                                   | 7-8   | Zero events explicitly reported for: laryngospasm (0/50 vs 0/50), bronchospasm (0/50 vs 0/50), allergic reactions (0/50 vs 0/50), serious adverse events (0/50 vs 0/50), PONV in remimazolam group (0/50).                                                         |
| Ancillary analyses | 18  | Results of any other analyses performed for outcomes of benefits and harms, including subgroup analyses and adjusted analyses, distinguishing prespecified from exploratory                    | 6-7   | Subgroup analyses performed for efficacy (ED by age stratum) were prespecified. No subgroup analyses for safety outcomes due to low event rates - acknowledged as limitation.                                                                                      |
| Limitations        | 20  | Trial limitations, addressing sources of potential bias related to the approach to collecting or reporting data on harms, imprecision, and, if relevant, multiplicity or selection of analyses | 10    | Explicitly acknowledged: (1) Trial underpowered for rare AEs; (2) Hypotension trend (P=0.11) requires confirmation in larger studies; (3) Short-term follow-up limits detection of delayed harms; (4) Single-centre may limit generalisability of safety findings. |
| Protocol           | 24  | Where the full trial protocol and other relevant documents can be accessed, including additional data on harms                                                                                 | 3, 11 | Full protocol published: BMC Anesthesiology 2025;25:527 (Reference 16). Protocol includes                                                                                                                                                                          |

|  |  |  |  |                                                                |
|--|--|--|--|----------------------------------------------------------------|
|  |  |  |  | complete list of prespecified safety outcomes and definitions. |
|--|--|--|--|----------------------------------------------------------------|

*Citation: Junqueira DR, Zorzela L, Golder S, et al. CONSORT Harms 2022 statement, explanation, and elaboration: updated guideline for the reporting of harms in randomised trials. BMJ. 2023;381:e073725.*
